# Supplementary material for: Novel chelators based on adamantane-derived semicarbazones and hydrazones that target multiple hallmarks of Alzheimer's disease
Source: Royal Society of Chemistry journal article supplement (doi:10.1039/c8dt01099d), 2018-01-01
Supplement: c8dt01099d1.pdf [file c8dt01099d1.pdf]

**Supplementary Information for**  
**Novel Chelators Based on Adamantane-Derived Semicarbazones and Hydrazones that**  
**Target Multiple Hallmarks of Alzheimer's Disease**

Duraippandi Palanimuthu<sup>a</sup>, Zhixuan Wu<sup>a</sup>, Patric J. Jansson<sup>a</sup>, Nady Braidy<sup>b</sup>, Paul V. Bernhardt<sup>c</sup>,  
Des R. Richardson<sup>a\*</sup> and Danuta S. Kalinowski<sup>a\*</sup>

<sup>a</sup>*Molecular Pharmacology and Pathology Program, Department of Pathology and Bosch Institute, The University of Sydney, Sydney, New South Wales, 2006, Australia.*

<sup>b</sup>*Centre for Healthy Brain Ageing, School of Psychiatry, University of New South Wales, Sydney, 2031, Australia.*

<sup>c</sup>*School of Chemistry and Molecular Biosciences, University of Queensland, Brisbane, 4072, Australia.*

|                                                                                                                                                                  |     |
|------------------------------------------------------------------------------------------------------------------------------------------------------------------|-----|
| General Procedure for the Preparation of Copper Complexes of the ASC Ligands                                                                                     | S2  |
| General Procedure for the Preparation of Copper Complexes of the ABH Ligands                                                                                     | S3  |
| General Procedure for the Preparation of Iron Complexes of the ASC and ABH Ligands                                                                               | S5  |
| <b>Figure S1.</b> Inter- and intra-molecular hydrogen bond interactions in <b>6</b>                                                                              | S10 |
| <b>Figure S2.</b> Inter- and intra-molecular hydrogen bond interactions in [Cu( <b>2</b> )Cl] <sub>2</sub>                                                       | S11 |
| <b>Figure S3.</b> EPR spectra of Fe complexes of selected semicarbazones and hydrazones                                                                          | S12 |
| <b>Figure S4.</b> EPR spectra of Cu <sup>II</sup> complexes of selected semicarbazones and hydrazones                                                            | S13 |
| <b>Figure S5.</b> Cyclic voltammograms of selected Cu complexes                                                                                                  | S14 |
| <b>Figure S6.</b> Linear relationship between the experimental and reported effective permeability coefficients ( <i>P<sub>e</sub></i> ) determined by PAMPA-BBB | S15 |
| <b>Table S1.</b> Effective permeability coefficients ( <i>P<sub>e</sub></i> ) of reference agents                                                                | S16 |
| <b>Table S2.</b> Classification of effective permeability coefficients ( <i>P<sub>e</sub></i> )                                                                  | S16 |

## General Procedure for the Preparation of Copper Complexes of the ASC Ligands

To a hot methanolic (5 mL) solution of the ASC ligand (1 mmol), copper chloride dihydrate (179 mg, 1.05 mmol) was added and refluxed for 2 h. The precipitate formed was cooled to room temperature and collected by vacuum filtration, washed with diethyl ether and dried in air.

### [Cu(1)Cl<sub>2</sub>] $\cdot$ 1.5H<sub>2</sub>O

Light green solid (0.32 g). Yield: 65%. ESI-MS in CH<sub>3</sub>CN: found mass: 460.60 (100%), Calc. mass for CuC<sub>21</sub>H<sub>28</sub>N<sub>5</sub>O<sub>3</sub>: 461.16 [M–2Cl<sup>–</sup>–H<sup>+</sup>+CH<sub>3</sub>CN]<sup>+</sup>. Anal. Calc. for CuC<sub>19</sub>H<sub>25</sub>N<sub>4</sub>O<sub>3</sub>Cl $\cdot$ HCl $\cdot$ 1.5H<sub>2</sub>O (%): C 43.89, H 5.62, N 10.78. Found (%): C 43.58, H 5.49, N 10.63.

### [Cu(2-H)Cl] $\cdot$ 0.5CH<sub>3</sub>OH

Yellow-green solid (0.28 g). Yield: 68%. ESI-MS in CH<sub>3</sub>CN: found mass: 415.73 (100%), Calc. mass for CuC<sub>20</sub>H<sub>25</sub>N<sub>4</sub>O<sub>2</sub>: 416.14 [M–Cl<sup>–</sup>+CH<sub>3</sub>CN]<sup>+</sup>. Anal. Calc. for CuC<sub>18</sub>H<sub>22</sub>N<sub>3</sub>O<sub>2</sub>Cl $\cdot$ 0.5CH<sub>3</sub>OH (%): C 51.99, H 5.66, N 9.83. Found (%): C 52.04, H 5.48, N 10.02.

### [Cu(3-H)Cl] $\cdot$ 0.5CH<sub>3</sub>OH

Light brown solid (0.24 g). Yield: 52%. ESI-MS in CH<sub>3</sub>CN: found mass: 465.80 (100%), Calc. mass for CuC<sub>24</sub>H<sub>27</sub>N<sub>4</sub>O<sub>2</sub>: 466.15 [M–Cl<sup>–</sup>+CH<sub>3</sub>CN]<sup>+</sup>. Anal. Calc. for CuC<sub>22</sub>H<sub>24</sub>N<sub>3</sub>O<sub>2</sub>Cl $\cdot$ 0.5CH<sub>3</sub>OH (%): C 56.60, H 5.49, N 8.80. Found (%): C 56.69, H 5.19, N 8.85.

### [Cu(4-H)Cl] $\cdot$ HCl

Green solid (0.22 g). Yield: 51%. ESI-MS in CH<sub>3</sub>CN: found mass: 395.93 (100%), Calc. mass for CuC<sub>17</sub>H<sub>22</sub>N<sub>4</sub>OCl: 396.09 [M+H<sup>+</sup>]<sup>+</sup>. Anal. Calc. for CuC<sub>17</sub>H<sub>21</sub>N<sub>4</sub>OCl $\cdot$ HCl (%): C 47.33, H 5.14, N 12.99. Found (%): C 47.22, H 5.04, N 12.95.

### **[Cu(5-H)Cl]·HCl**

Dark brown solid (0.29 g). Yield: 63%. ESI-MS in CH<sub>3</sub>CN: found mass: 426.00 (100%), Calc. mass for CuC<sub>21</sub>H<sub>23</sub>N<sub>4</sub>O<sub>2</sub>: 426.12 [M-2Cl<sup>-</sup>-H<sup>+</sup>]<sup>+</sup>. Anal. Calc. for CuC<sub>21</sub>H<sub>23</sub>N<sub>4</sub>O<sub>2</sub>Cl·HCl (%): C 50.56, H 4.85, N 11.23. Found (%): C 50.30, H 4.40, N 11.09.

### **[Cu(6-H)Cl]·2CH<sub>3</sub>OH**

Dark brown solid (0.24 g). Yield: 56%. ESI-MS in CH<sub>3</sub>CN: found mass: 431.80 (80%), Calc. mass for CuC<sub>20</sub>H<sub>25</sub>N<sub>4</sub>O<sub>3</sub>: 432.13 [M-Cl<sup>-</sup>+CH<sub>3</sub>CN]<sup>+</sup>, found mass: 422.73 (100%), Calc. mass for CuC<sub>19</sub>H<sub>26</sub>N<sub>3</sub>O<sub>4</sub>: 423.13 [M-Cl<sup>-</sup>+CH<sub>3</sub>OH]<sup>+</sup>. Anal. Calc. for CuC<sub>18</sub>H<sub>22</sub>N<sub>3</sub>O<sub>3</sub>Cl·2CH<sub>3</sub>OH (%): C 48.88, H 6.15, N 8.55. Found (%): C 49.00, H 5.62, N 8.55.

### **General Procedure for the Preparation of Copper Complexes of the ABH Ligands**

Copper complexes of the ABH ligands were prepared by following the procedure outlined for the preparation of the copper complexes of the ASC ligands above. The only exception to this protocol was that 0.5 mmol of the ABH ligand was refluxed with copper chloride dihydrate (90 mg, 0.53 mmol).

### **[Cu(7)Cl<sub>2</sub>]**

Light green solid (0.28 g). Yield: 94%. ESI-MS (negative mode) in CH<sub>3</sub>CN: found mass: 558.05 (100%), Calc. mass for CuC<sub>26</sub>H<sub>28</sub>N<sub>4</sub>O<sub>4</sub>Cl: 558.12 [M-HCl-H<sup>+</sup>]<sup>-</sup>. Anal. Calc. for CuC<sub>26</sub>H<sub>30</sub>N<sub>4</sub>O<sub>4</sub>Cl<sub>2</sub> (%): C 52.31, H 5.07, N 9.39. Found (%): C 52.72, H 5.37, N 9.42.

**[Cu(8-H)Cl]·H<sub>2</sub>O**

Green solid (0.26 g). Yield: 97%. ESI-MS (negative mode) in CH<sub>3</sub>CN: found mass: 513.04 (100%), Calc. mass for CuC<sub>25</sub>H<sub>25</sub>N<sub>3</sub>O<sub>3</sub>Cl: 513.09 [M-H<sup>+</sup>]<sup>-</sup>. Anal. Calc. for CuC<sub>25</sub>H<sub>26</sub>N<sub>3</sub>O<sub>3</sub>Cl·H<sub>2</sub>O (%): C 56.28, H 5.29, N 7.88. Found (%): C 56.57, H 5.49, N 7.58.

**[Cu(9-H)Cl]·3H<sub>2</sub>O**

Grayish-green brown solid (0.30 g). Yield: 97%. ESI-MS (negative mode) in CH<sub>3</sub>CN: found mass: 563.10 (100%), Calc. mass for CuC<sub>29</sub>H<sub>27</sub>N<sub>3</sub>O<sub>3</sub>Cl: 563.11 [M-H<sup>+</sup>]<sup>-</sup>. Anal. Calc. for CuC<sub>29</sub>H<sub>28</sub>N<sub>3</sub>O<sub>3</sub>Cl·3H<sub>2</sub>O (%): C 56.22, H 5.53, N 6.78. Found (%): C 56.22, H 5.46, N 6.73.

**[Cu(10)Cl<sub>2</sub>]**

Yellowish green solid (0.25 g). Yield: 93%. ESI-MS in CH<sub>3</sub>CN: found mass: 522.04 (100%), Calc. mass for CuC<sub>24</sub>H<sub>25</sub>N<sub>4</sub>O<sub>2</sub>ClNa: 522.09 [M-HCl+Na<sup>+</sup>]<sup>+</sup>. Anal. Calc. for CuC<sub>24</sub>H<sub>26</sub>N<sub>4</sub>O<sub>2</sub>Cl<sub>2</sub> (%): C 53.69, H 4.88, N 10.43. Found (%): C 53.82, H 4.86, N 10.42.

**[Cu(11)Cl<sub>2</sub>]·H<sub>2</sub>O**

Grey-yellow solid (0.23 g). Yield: 72%. ESI-MS (negative mode) in CH<sub>3</sub>CN: found mass: 564.06 (40%), Calc. mass for CuC<sub>28</sub>H<sub>26</sub>N<sub>4</sub>O<sub>3</sub>Cl: 564.11 [M-2H<sup>+</sup>-Cl]<sup>-</sup>. Anal. Calc. for CuC<sub>28</sub>H<sub>28</sub>N<sub>4</sub>O<sub>3</sub>Cl<sub>2</sub>·H<sub>2</sub>O (%): C 54.15, H 4.87, N 9.02. Found (%): C 54.28, H 4.87, N 9.03.

**[Cu(12)Cl<sub>2</sub>]·CH<sub>3</sub>OH**

Grey solid (0.25 g). Yield: 42%. ESI-MS (negative mode) in CH<sub>3</sub>CN: found mass: 529.07 (100%), Calc. mass for CuC<sub>25</sub>H<sub>25</sub>N<sub>3</sub>O<sub>4</sub>Cl: 529.09 [M-2H<sup>+</sup>-Cl]<sup>-</sup>. Anal. Calc. for CuC<sub>25</sub>H<sub>27</sub>N<sub>3</sub>O<sub>4</sub>Cl<sub>2</sub>·CH<sub>3</sub>OH (%): C 52.05, H 5.21, N 7.00. Found (%): C 51.71, H 5.01, N 7.10.

### General Procedure for the Preparation of Iron Complexes of the ASC and ABH Ligands

The ligand (0.5 mmol; except for **10**) was dissolved in ethanol (10 mL) with heating. If not completely soluble, a few millilitres of acetonitrile was added to completely dissolve the ligands. Ferric perchlorate hexahydrate (115 mg, 0.25 mmol) was added and refluxed for 1 h. The solution was concentrated and poured into diethyl ether to precipitate the product, which was filtered, washed with adequate amounts of diethyl ether and dried in air.

As described previously, the Fe<sup>II</sup> complex of **10** was prepared by an alternative procedure due to the inability to isolate a pure complex by the method above and because of the known preference of pyridine-derived hydrazones to form Fe<sup>II</sup> complexes.<sup>1</sup> Briefly, **10** (0.25 mmol) was suspended in acetonitrile (10 mL) and triethylamine (5 mmol) was added. The resulting solution was degassed under nitrogen. Ferrous perchlorate hexahydrate (45 mg, 0.12 mmol) dissolved in degassed acetonitrile (5 mL) was added drop wise to the ligand solution under reflux and the reaction mixture was refluxed for 3 h. The precipitate formed was collected by filtration, washed with methanol and air dried.

#### [Fe(**1-H**)<sub>2</sub>]ClO<sub>4</sub>·H<sub>2</sub>O

Dark brown solid (0.18 g). Yield: 41%. ESI-MS (negative mode) in CH<sub>3</sub>OH: found mass: 768.37 (100%), Calc. mass for FeC<sub>38</sub>H<sub>48</sub>N<sub>8</sub>O<sub>6</sub>: 768.30 [M-2H<sup>+</sup>-ClO<sub>4</sub><sup>-</sup>]<sup>-</sup>. ESI-MS (positive mode) in CH<sub>3</sub>OH: found mass: 770.34 (100%), Calc. mass for FeC<sub>38</sub>H<sub>50</sub>N<sub>8</sub>O<sub>6</sub>: 770.32 [M-ClO<sub>4</sub><sup>-</sup>]<sup>+</sup>. Anal. Calc. for FeC<sub>38</sub>H<sub>50</sub>N<sub>8</sub>O<sub>10</sub>Cl·H<sub>2</sub>O (%): C 51.39, H 5.90, N 12.62. Found (%): C 51.29, H 6.04, N 12.54. IR (cm<sup>-1</sup>) 2904 (m), 2849 (w), 1623 (s), 1558 (m), 1390 (m), 1302 (m), 1248 (m), 1196 (m), 1091 (vs ClO<sub>4</sub><sup>-</sup>), 1064 (vs), 923 (w), 662 (w), 613 (m), 567 (m).

**[Fe(2-H)<sub>2</sub>]ClO<sub>4</sub>·0.5H<sub>2</sub>O**

Black solid (0.20 g). Yield: 51%. ESI-MS (negative mode) in CH<sub>3</sub>OH: found mass: 678.32 (100%), Calc. mass for FeC<sub>36</sub>H<sub>42</sub>N<sub>6</sub>O<sub>4</sub>: 678.26 [M-2H<sup>+</sup>-ClO<sub>4</sub><sup>-</sup>]<sup>-</sup>. ESI-MS (positive mode) in CH<sub>3</sub>OH: found mass: 680.27 (100%), Calc. mass for FeC<sub>36</sub>H<sub>44</sub>N<sub>6</sub>O<sub>4</sub>: 680.28 [M-ClO<sub>4</sub><sup>-</sup>]<sup>+</sup>. Anal. Calc. for FeC<sub>36</sub>H<sub>44</sub>N<sub>6</sub>O<sub>8</sub>Cl·0.5H<sub>2</sub>O (%): C 54.80, H 5.75, N 10.65. Found (%): C 54.76, H 5.96, N 10.42. IR (cm<sup>-1</sup>) 3312 (m), 2904 (m), 2851 (w), 1617 (s), 1564 (s), 1468 (m), 1375 (m), 1303 (m), 1208 (m), 1086 (vs, ClO<sub>4</sub><sup>-</sup>), 1064 (vs), 831 (w), 752 (s), 621 (s), 420 (s).

**[Fe(3-H)<sub>2</sub>]ClO<sub>4</sub>**

Dark green solid (0.22 g). Yield: 50%. ESI-MS (negative mode) in CH<sub>3</sub>OH: found mass: 778.38 (100%), Calc. mass for FeC<sub>44</sub>H<sub>46</sub>N<sub>6</sub>O<sub>4</sub>: 778.29 [M-2H<sup>+</sup>-ClO<sub>4</sub><sup>-</sup>]<sup>-</sup>. ESI-MS (positive mode) in CH<sub>3</sub>OH: found mass: 780.33 (100%), Calc. mass for FeC<sub>44</sub>H<sub>48</sub>N<sub>6</sub>O<sub>4</sub>: 780.31 [M-ClO<sub>4</sub><sup>-</sup>]<sup>+</sup>. Anal. Calc. for FeC<sub>44</sub>H<sub>48</sub>N<sub>6</sub>O<sub>8</sub>Cl (%): C 60.04, H 5.50, N 9.55. Found (%): C 60.15, H 5.67, N 9.88. IR (cm<sup>-1</sup>) 2906 (m), 1618 (s), 1575 (s), 1466 (m), 1318 (m), 1241 (m), 1182 (w), 1083 (s, ClO<sub>4</sub><sup>-</sup>), 1029 (s), 954 (w), 831 (m), 786 (m), 750 (vs), 622 (s), 419 (s).

**[Fe(4)(4-H)]ClO<sub>4</sub>·0.5C<sub>2</sub>H<sub>5</sub>OH**

Dark green solid (0.20 g). Yield: 44%. ESI-MS (positive mode) in CH<sub>3</sub>OH: found mass: 651.24 (35%), Calc. mass for FeC<sub>34</sub>H<sub>43</sub>N<sub>8</sub>O<sub>2</sub>: 651.29 [M-ClO<sub>4</sub><sup>-</sup>]<sup>+</sup>. Anal. Calc. for FeC<sub>34</sub>H<sub>43</sub>N<sub>8</sub>O<sub>6</sub>Cl·0.5C<sub>2</sub>H<sub>5</sub>OH (%): C 54.31, H 5.99, N 14.48. Found (%): C 54.23, H 6.15, N 14.53. IR (cm<sup>-1</sup>) 2908 (m, CH), 2852 (m, CH), 1650 (m, C=O), 1551 (s, C=N), 1468 (m), 1360 (m), 1303 (m), 1245 (w), 1088 (vs, ClO<sub>4</sub><sup>-</sup>), 920 (w), 774 (m), 620 (s), 517 (m), 425 (m).

**[Fe(5-H)<sub>2</sub>]ClO<sub>4</sub>·0.75H<sub>2</sub>O**

Dark brown solid (0.27 g). Yield: 61%. ESI-MS (negative mode) in CH<sub>3</sub>OH: found mass: 780.53 (100%), Calc. mass for FeC<sub>42</sub>H<sub>44</sub>N<sub>8</sub>O<sub>4</sub>: 780.29 [M-2H<sup>+</sup>-ClO<sub>4</sub><sup>-</sup>]<sup>-</sup>. ESI-MS (positive mode) in CH<sub>3</sub>OH: found mass: 782.31 (100%), Calc. mass for FeC<sub>42</sub>H<sub>46</sub>N<sub>8</sub>O<sub>4</sub>: 782.30 [M-ClO<sub>4</sub><sup>-</sup>]<sup>+</sup>. Anal. Calc. for FeC<sub>42</sub>H<sub>46</sub>N<sub>8</sub>O<sub>8</sub>Cl·0.75H<sub>2</sub>O (%): C 56.32, H 5.35, N 12.51. Found (%): C 56.05, H 5.38, N 13.18. IR (cm<sup>-1</sup>) 3246 (w), 2905 (m), 2848 (m) 1634 (s), 1541 (s), 1448 (s), 1338 (s), 1299 (m), 1183 (w), 1090 (vs, ClO<sub>4</sub><sup>-</sup>), 1061 (vs), 908 (m), 835 (m), 742 (s), 622 (s), 495 (s).

**[Fe(6-H)<sub>2</sub>]ClO<sub>4</sub>·C<sub>2</sub>H<sub>5</sub>OH**

Dark brown solid (0.19 g). Yield: 47%. ESI-MS (positive mode) in CH<sub>3</sub>OH: found mass: 712.26 (50%), Calc. mass for FeC<sub>36</sub>H<sub>44</sub>N<sub>6</sub>O<sub>6</sub>: 712.27 [M-ClO<sub>4</sub><sup>-</sup>]<sup>+</sup>. Anal. Calc. for FeC<sub>36</sub>H<sub>44</sub>N<sub>6</sub>O<sub>10</sub>Cl·C<sub>2</sub>H<sub>5</sub>OH (%): C 53.19, H 5.87, N 9.79. Found (%): C 52.97, H 6.09, N 9.90. IR (cm<sup>-1</sup>) 3325 (w), 2906 (m), 2851 (m) 1619 (s), 1568 (s), 1448 (m), 1377 (m), 1302 (s), 1227 (m), 1071 (vs, ClO<sub>4</sub><sup>-</sup>), 926 (m), 868 (m), 739 (s), 621 (s), 436 (s).

**[Fe(7-H)<sub>2</sub>]ClO<sub>4</sub>·4H<sub>2</sub>O**

Dark brown solid (0.28 g). Yield: 52%. ESI-MS (negative mode) in CH<sub>3</sub>OH: found mass: 976.53 (100%), Calc. mass for FeC<sub>52</sub>H<sub>56</sub>N<sub>8</sub>O<sub>8</sub>: 976.36 [M-2H<sup>+</sup>-ClO<sub>4</sub><sup>-</sup>]<sup>-</sup>. ESI-MS (positive mode) in CH<sub>3</sub>OH: found mass: 1000.40 (25%), Calc. mass for FeC<sub>52</sub>H<sub>57</sub>N<sub>8</sub>O<sub>8</sub>Na: 1000.36 [M-H<sup>+</sup>+Na<sup>+</sup>-ClO<sub>4</sub><sup>-</sup>]<sup>+</sup>. Anal. Calc. for FeC<sub>52</sub>H<sub>58</sub>N<sub>8</sub>O<sub>12</sub>Cl·4H<sub>2</sub>O (%): C 54.29, H 5.78, N 9.74. Found (%): C 54.01, H 5.78, N 9.72. IR (cm<sup>-1</sup>) 3271 (w), 2905 (m), 2850 (m), 1657 (m), 1639 (m), 1583 (m), 1456 (m), 1379 (s), 1304 (m), 1085 (vs, ClO<sub>4</sub><sup>-</sup>), 1059 (vs), 867 (m), 727 (m), 621 (s).

**[Fe(8-H)<sub>2</sub>]ClO<sub>4</sub>·(C<sub>2</sub>H<sub>5</sub>)<sub>3</sub>N·0.25H<sub>2</sub>O**

Black solid (0.33 g). Yield: 67%. ESI-MS (negative mode) in CH<sub>3</sub>OH: found mass: 886.43 (100%), Calc. mass for FeC<sub>50</sub>H<sub>50</sub>N<sub>6</sub>O<sub>6</sub>: 886.32 [M-2H<sup>+</sup>-ClO<sub>4</sub><sup>-</sup>]<sup>-</sup>. ESI-MS (positive mode) in CH<sub>3</sub>OH: found mass: 932.33 (60%), Calc. mass for FeC<sub>50</sub>H<sub>50</sub>N<sub>6</sub>O<sub>6</sub>Na<sub>2</sub>: 932.30 [M-2H<sup>+</sup>+2Na<sup>+</sup>-ClO<sub>4</sub><sup>-</sup>]<sup>+</sup>. Anal. Calc. for FeC<sub>50</sub>H<sub>52</sub>N<sub>6</sub>O<sub>10</sub>Cl·(C<sub>2</sub>H<sub>5</sub>)<sub>3</sub>N·0.25H<sub>2</sub>O (%): C 61.48, H 6.22, N 8.96. Found (%): C 61.76, H 6.11, N 8.55. IR (cm<sup>-1</sup>) 3256 (w), 2905 (s), 2850 (m), 1588 (s), 1537 (s), 1493 (m), 1439 (m), 1384 (m), 1298 (s), 1202 (m), 1084 (s, ClO<sub>4</sub><sup>-</sup>), 894 (m), 867 (m), 757 (m), 607 (s).

**[Fe(9-H)<sub>2</sub>]ClO<sub>4</sub>·6.5H<sub>2</sub>O**

Black solid (0.29 g). Yield: 53%. ESI-MS (negative mode) in CH<sub>3</sub>OH: found mass: 986.62 (100%), Calc. mass for FeC<sub>58</sub>H<sub>54</sub>N<sub>6</sub>O<sub>6</sub>: 986.35 [M-2H<sup>+</sup>-ClO<sub>4</sub><sup>-</sup>]<sup>-</sup>. ESI-MS (positive mode) in CH<sub>3</sub>OH: found mass: 1032.41 (100%), Calc. mass for FeC<sub>58</sub>H<sub>54</sub>N<sub>6</sub>O<sub>6</sub>Na<sub>2</sub>: 1032.33 [M-2H<sup>+</sup>+2Na<sup>+</sup>-ClO<sub>4</sub><sup>-</sup>]<sup>+</sup>. Anal. Calc. for FeC<sub>58</sub>H<sub>56</sub>N<sub>6</sub>O<sub>10</sub>Cl·6.5H<sub>2</sub>O (%): C 57.79, H 5.77, N 6.97. Found (%): C 57.80, H 5.39, N 6.97. IR (cm<sup>-1</sup>) 2906 (s), 2851 (m), 1578 (s), 1526 (s), 1380 (m), 1359 (s), 1301 (s), 1198 (m), 1090 (s, ClO<sub>4</sub><sup>-</sup>), 976 (m), 826 (m), 781 (m), 652 (s), 523 (s).

**[Fe(10-H)<sub>2</sub>]·1.25H<sub>2</sub>O**

Dark green solid (0.1 g). Yield: 46%. ESI-MS (positive mode) in CH<sub>3</sub>OH: found mass: 881.35 (40%), Calc. mass for FeC<sub>48</sub>H<sub>50</sub>N<sub>8</sub>O<sub>4</sub>Na: 881.32 [M+Na<sup>+</sup>]<sup>+</sup>; found mass: 859.42 (13%), Calc. mass for FeC<sub>48</sub>H<sub>51</sub>N<sub>8</sub>O<sub>4</sub>: 859.81 [M+H<sup>+</sup>]<sup>+</sup>. Anal. Calc. for FeC<sub>48</sub>H<sub>50</sub>N<sub>8</sub>O<sub>4</sub>·1.25H<sub>2</sub>O (%): C 65.41, H 6.00, N 12.71. Found (%): C 65.41, H 5.89, N 12.60. IR (cm<sup>-1</sup>) 3337 (w), 2905 (m), 2849 (m), 1643 (s), 1531 (s), 1452 (s), 1358 (s), 1304 (s), 1142 (m), 1061 (m), 864 (m), 712 (m).

**[Fe(11-H)<sub>2</sub>]ClO<sub>4</sub>·H<sub>2</sub>O**

Greenish brown solid (0.25 g). Yield: 46%. ESI-MS (negative mode) in CH<sub>3</sub>OH: found mass: 988.35 (100%), Calc. mass for FeC<sub>56</sub>H<sub>52</sub>N<sub>8</sub>O<sub>6</sub>: 988.34 [M-2H<sup>+</sup>-ClO<sub>4</sub><sup>-</sup>]<sup>-</sup>. Anal. Calc. for FeC<sub>56</sub>H<sub>54</sub>N<sub>8</sub>O<sub>10</sub>Cl·H<sub>2</sub>O (%): C 60.68, H 5.09, N 10.11. Found (%): C 60.42, H 5.22, N 10.11. IR (cm<sup>-1</sup>) 2906 (m), 2850 (w), 1639 (m), 1543 (m), 1451 (m), 1343 (m), 1300 (m), 1241 (m), 1091 (vs, ClO<sub>4</sub><sup>-</sup>), 1061 (vs), 922 (m), 838 (m), 750 (m), 621 (s).

**[Fe(12-H)<sub>2</sub>]ClO<sub>4</sub>·H<sub>2</sub>O**

Black solid (0.24 g). Yield: 47%. ESI-MS (negative mode) in CH<sub>3</sub>OH: found mass: 918.49 (100%), Calc. mass for FeC<sub>50</sub>H<sub>50</sub>N<sub>6</sub>O<sub>8</sub>: 918.31 [M-2H<sup>+</sup>-ClO<sub>4</sub><sup>-</sup>]<sup>-</sup>. Anal. Calc. for FeC<sub>50</sub>H<sub>52</sub>N<sub>6</sub>O<sub>12</sub>Cl·H<sub>2</sub>O (%): C 59.44, H 5.60, N 8.50. Found (%): C 59.39, H 5.60, N 8.27. IR (cm<sup>-1</sup>) 3320 (s), 2907 (m), 2851 (w), 1620 (m), 1566 (s), 1448 (m), 1375 (m), 1346 (m), 1227 (m), 1071 (vs, ClO<sub>4</sub><sup>-</sup>), 924 (m), 736 (s), 621 (s), 487 (s).

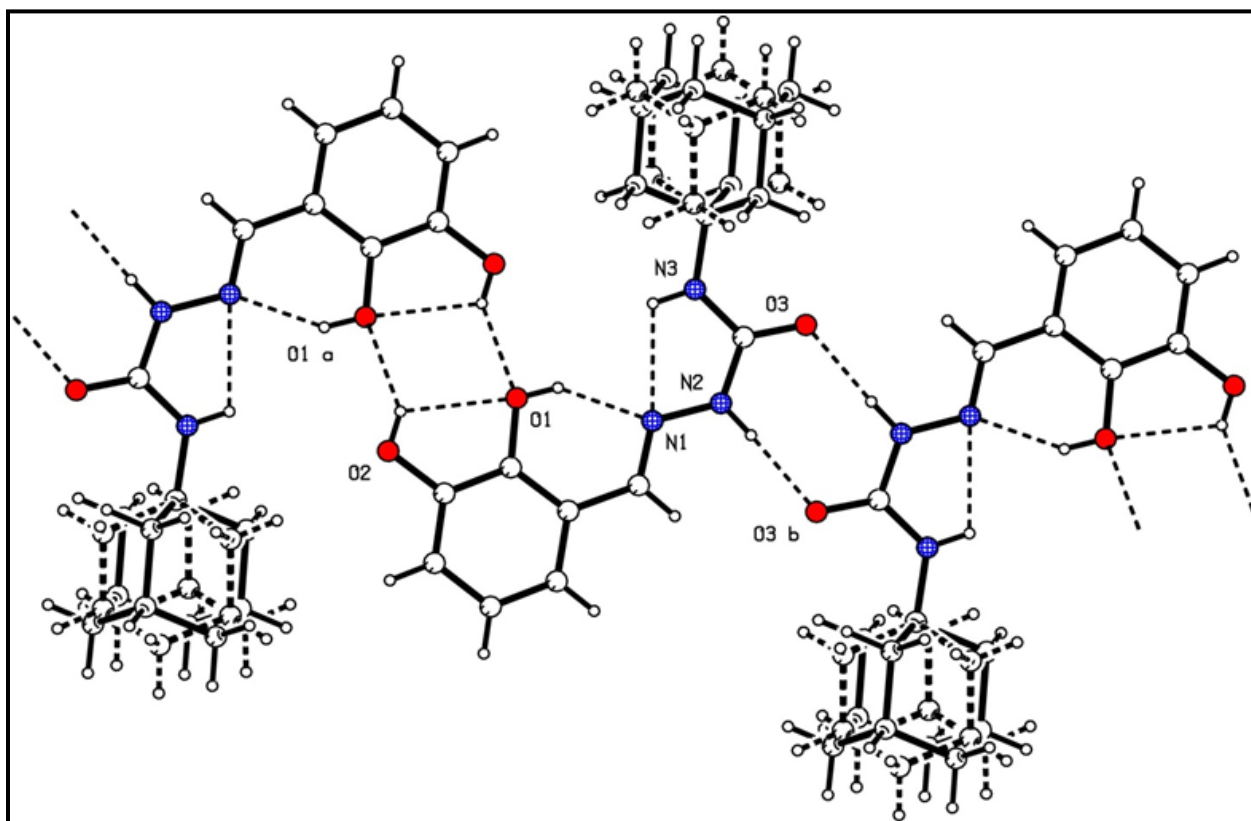

**Figure S1.** Inter- and intra-molecular hydrogen bond interactions in **6**.

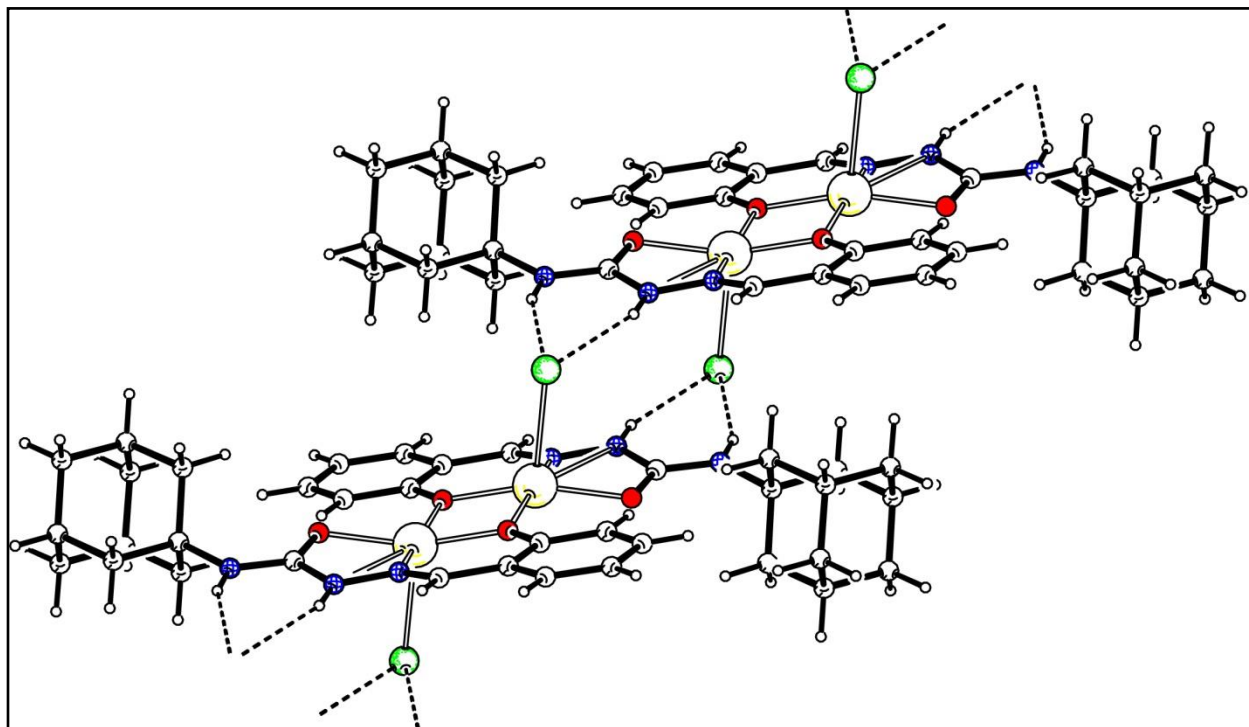

**Figure S2.** Inter- and intra-molecular hydrogen bond interactions in  $[\text{Cu}(\text{2})\text{Cl}]_2$ .

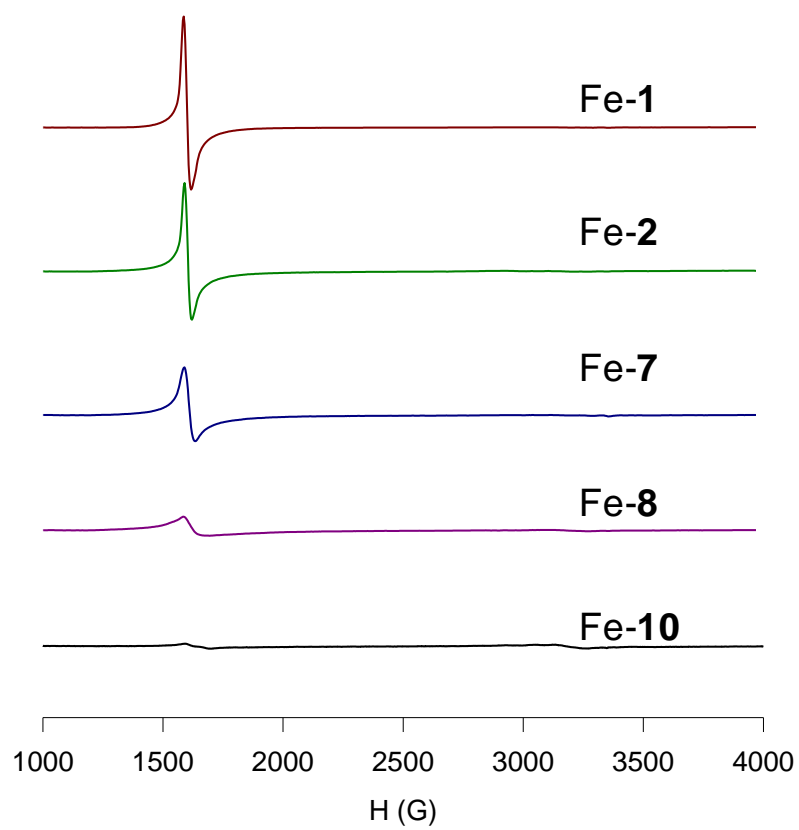

**Figure S3.** X-band (9.37448 GHz) EPR spectra of Fe complexes of selected semicarbazones and hydrazones (130 K, 1-3 mM in DMF:tris buffer 2:1).

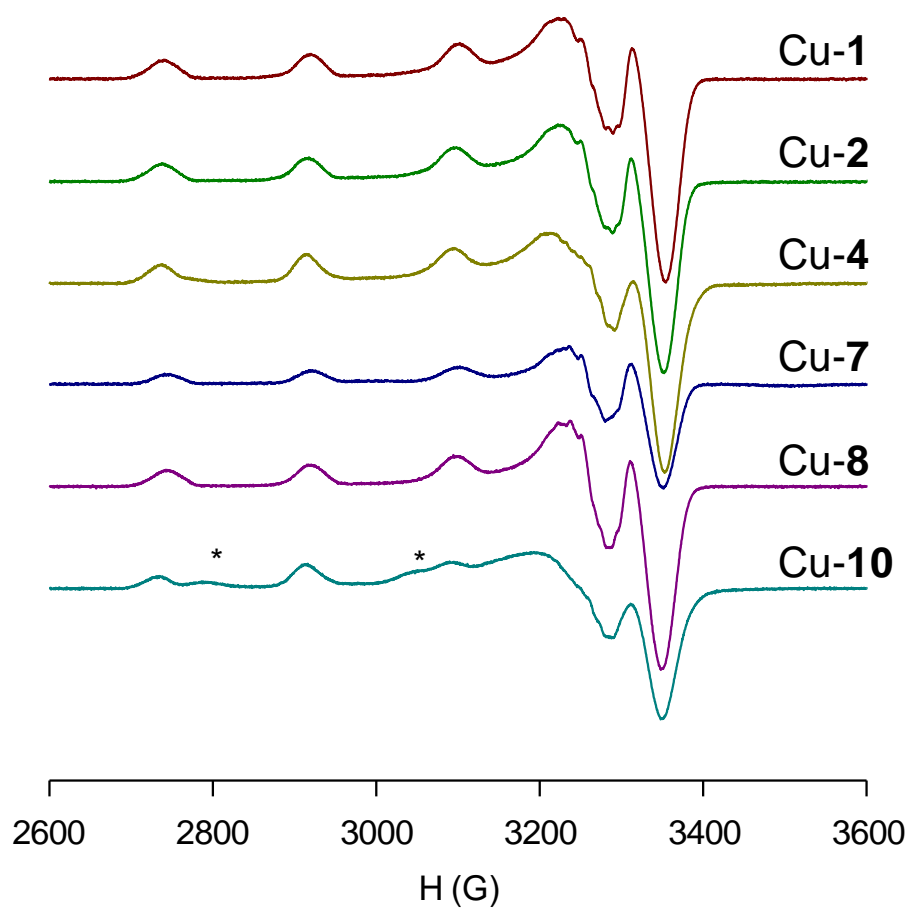

**Figure S4.** X-band (9.37448 GHz) EPR spectra of Cu<sup>II</sup> complexes of selected semicarbazones and hydrazones (130 K, DMF:tris buffer 2:1). Asterisks denote a minor 1:2 Cu:L complex species.

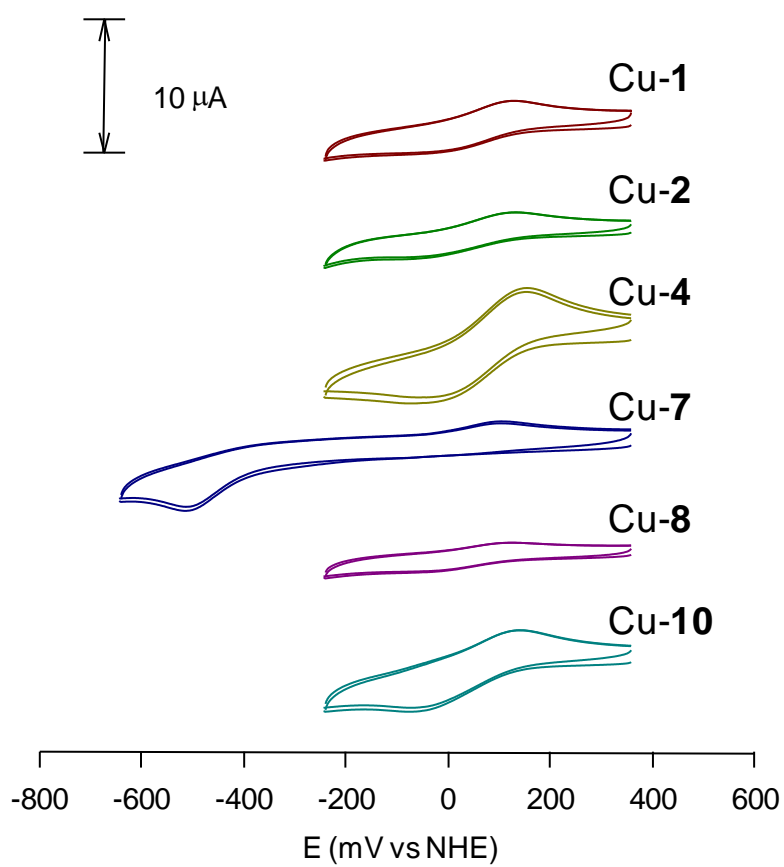

**Figure S5.** Cyclic voltammograms of selected Cu complexes (1-3 mM in DMF:Tris buffer 2:1 and 0.1 M  $\text{Et}_4\text{NClO}_4$ ). Sweep rate:  $100\ \text{mV s}^{-1}$ .

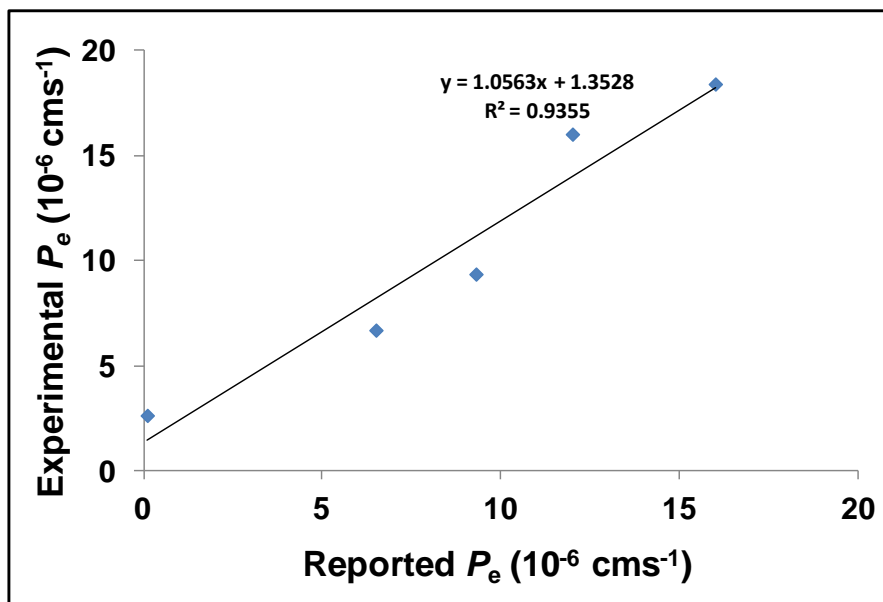

**Figure S6.** Linear relationship between the experimental and reported effective permeability coefficients ( $P_e$ ) determined by PAMPA-BBB.  $P_e(\text{exp}) = 1.0563 P_e(\text{ref}) + 1.3528$ . Results are presented as the mean of quadruplicate repeats examined in  $\geq 3$  experiments.

**Table S1.** Effective permeability coefficients ( $P_e$ ) of reference agents used for the validation of the PAMPA-BBB experiment.

| Reference Agent | $P_e$ ( $10^{-6}$ cm s $^{-1}$ ) |                    |
|-----------------|----------------------------------|--------------------|
|                 | Reference value                  | Experimental value |
| Theophylline    | 0.1 <sup>2</sup>                 | 2.63 $\pm$ 0.05    |
| Verapamil       | 16 <sup>2</sup>                  | 18.42 $\pm$ 3.04   |
| Progesterone    | 9.3 <sup>2</sup>                 | 9.36 $\pm$ 1.00    |
| Chlorpromazine  | 6.5 <sup>2</sup>                 | 6.69 $\pm$ 0.53    |
| Donepezil       | 12 <sup>3</sup>                  | 16.04 $\pm$ 4.20   |

**Table S2.** Classification of effective permeability coefficients ( $P_e$ ) determined by the PAMPA-BBB ( $P_e$ ,  $10^{-6}$  cm s $^{-1}$ ).<sup>4</sup>

|                                                     |                      |
|-----------------------------------------------------|----------------------|
| Compounds with predicted high BBB permeation (CNS+) | $P_e > 5.578$        |
| Compounds with uncertain BBB permeation (CNS+/-)    | $5.578 > P_e > 3.46$ |
| Compounds with predicted low BBB permeation (CNS-)  | $P_e < 3.46$         |

## References

1. P. V. Bernhardt, P. Chin, P. C. Sharpe, and D. R. Richardson, *Dalton Trans.*, 2007, 3232.
2. M. Shidore, J. Machhi, K. Shingala, P. Murumkar, M. K. Sharma, N. Agrawal, A. Tripathi, Z. Parikh, P. Pillai, and M. R. Yadav, *J. Med. Chem.*, 2016, **59**, 5823.
3. L. Di, E. D. Kerns, S. L. Petusky, and Y. Huang, *J. Pharm. Sci.* 2009, **98**, 1980.
4. L. Di, E. H. Kerns, K. Fan, O. J. McConnell, and G. T. Carter, *Eur. J. Med. Chem.*, 2003, **38**, 223.
